# Supplementary material for: MnO2/Ce6 microbubble-mediated hypoxia modulation for enhancing sono-photodynamic therapy against triple negative breast cancer
Source: Royal Society of Chemistry journal article supplement (doi:10.1039/d3bm00931a), 2024-01-01
Supplement: d3bm00931a1.pdf [file d3bm00931a1.pdf]

## Supplementary Information

# **MnO<sub>2</sub>/Ce6      microbubble-mediated      hypoxia modulation for enhancing sono-photodynamic therapy against triple negative breast**

Ping Li<sup>a,†</sup>, Xiao Tan<sup>a,b,†</sup>, Qing Dan<sup>a,†</sup>, Azhen Hu<sup>a,†</sup>, Zhengming Hu<sup>a,†</sup>, Xiaoting Yang<sup>a</sup>,  
Jianhua Bai<sup>a</sup>, Xiaoyu Chen<sup>a</sup>, Bowei Li<sup>c</sup>, Guanxun Cheng<sup>c</sup>, Li Liu<sup>a</sup>, Yun Chen<sup>a,\*</sup>,  
Desheng Sun<sup>a,\*</sup>, Xintao Shuai<sup>d,\*</sup>, Tingting Zheng<sup>a,\*</sup>

<sup>a</sup> Shenzhen Key Laboratory for Drug Addiction and Medication Safety, Department of Ultrasound, Institute of Ultrasonic Medicine, Peking University Shenzhen Hospital, Shenzhen Peking University-The Hong Kong University of Science and Technology Medical Center, Shenzhen 518036, P.R. China

<sup>b</sup> Zunyi Medical University, Zunyi 563000 P.R. China

<sup>c</sup> Department of Medical Imaging, Peking University Shenzhen Hospital, Shenzhen 518036, P.R. China

<sup>d</sup> Sun Yat-sen University, Guangzhou 510000, P.R. China

\*Corresponding author: Yun Chen (yunchen@sphmc.org), Desheng Sun (szdssun@163.com), Xintao Shuai (shuaixt@mail.sysu.edu.cn), and Tingting Zheng (dr.tingting.zheng@gmail.com).

† These authors contribute equally.

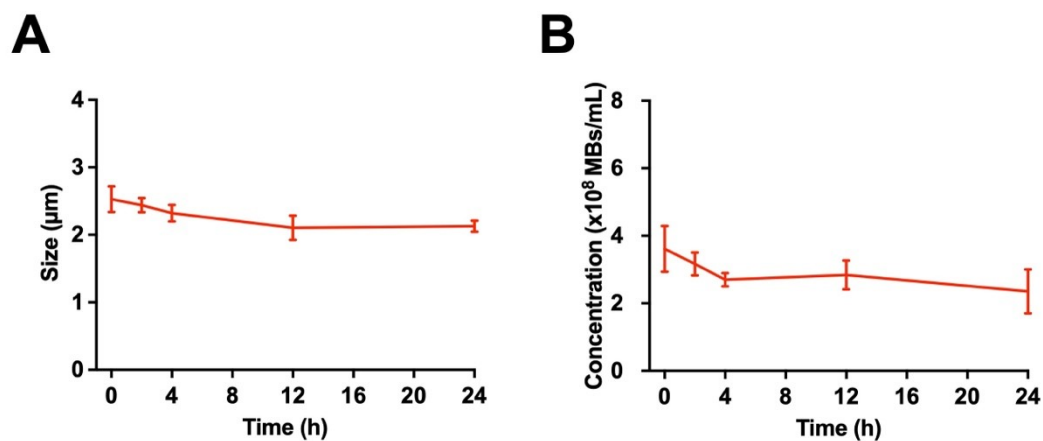

**Fig. S1** Stability of MnO<sub>2</sub>/Ce6@MBs. (A) Size of MnO<sub>2</sub>/Ce6@MBs within 24 hours. (B) Concentration of MnO<sub>2</sub>/Ce6@MBs within 24 hours.

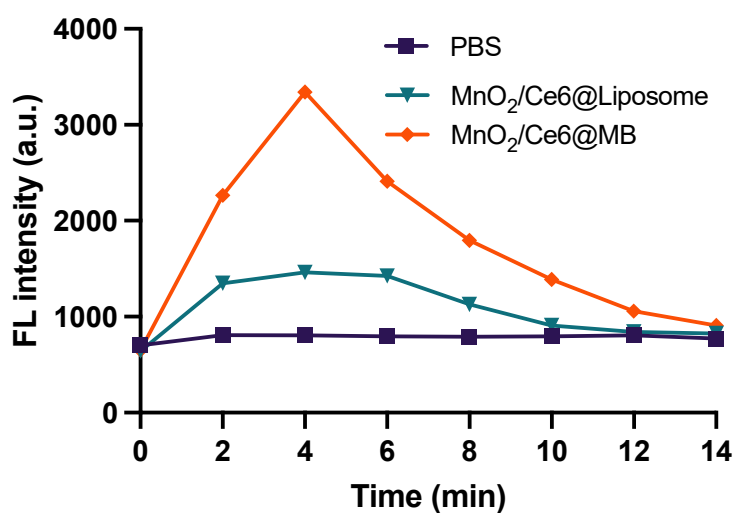

**Fig.S2** The SOSG intensity-time curve of different solutions under SPDT treatment.

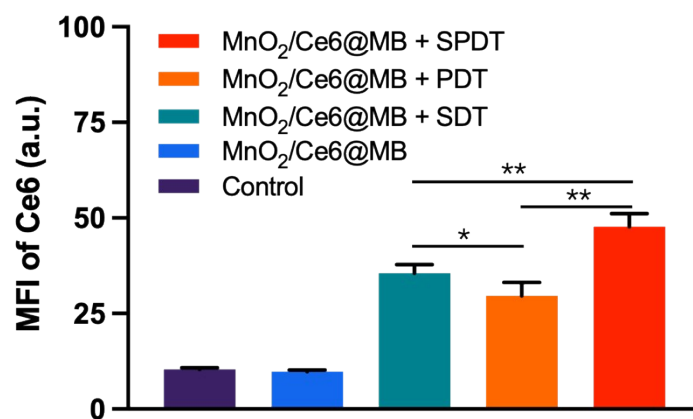

Fig. S3 Mean fluorescence intensity (MFI) of Ce6. \* $p < 0.05$ , \*\* $p < 0.01$ .

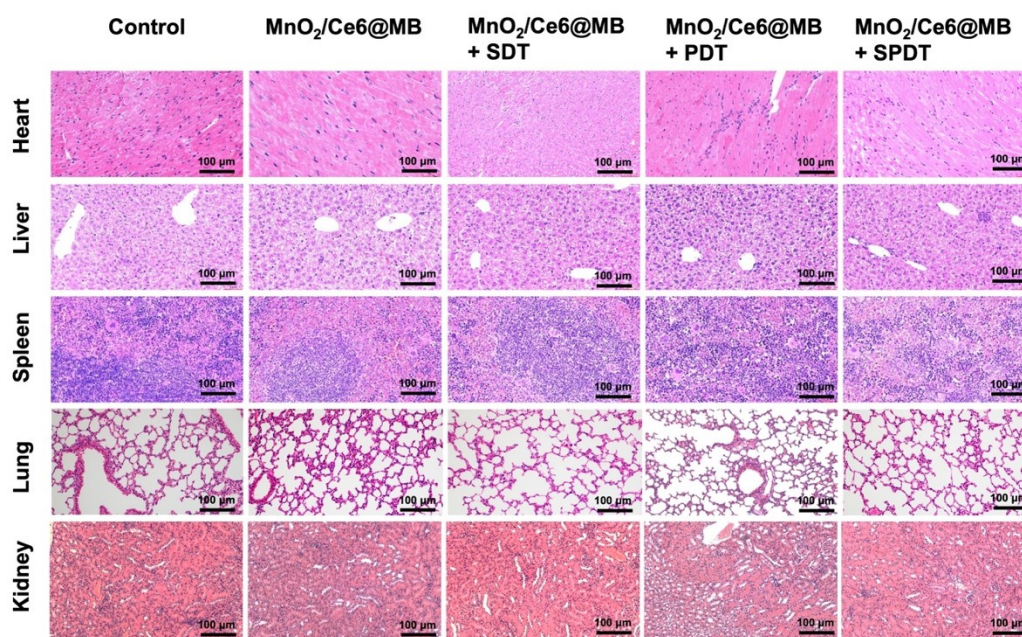

Fig. S4 H&E staining of main organs from 4T1-tumor bearing mice on the 14th day after various treatments. Scale bar = 100  $\mu\text{m}$ .

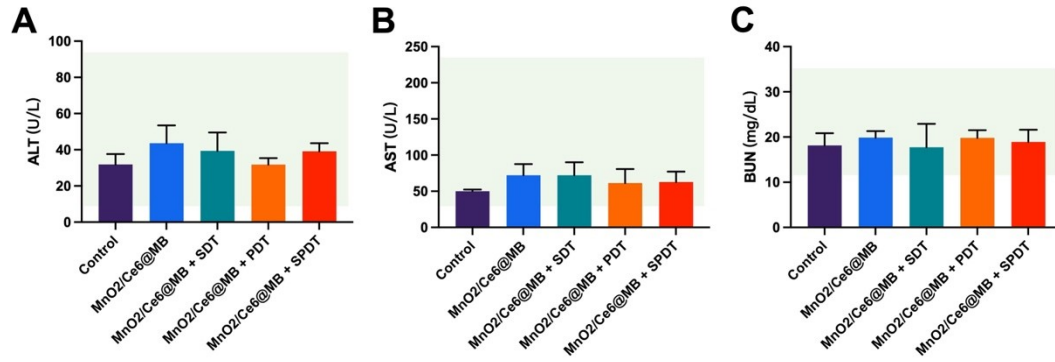

**Fig. S5** ALT, AST, and BUN examinations from 4T1-tumor bearing mice on the 14th day after various treatments. The green rectangular shows the reference ranges of normal mice.

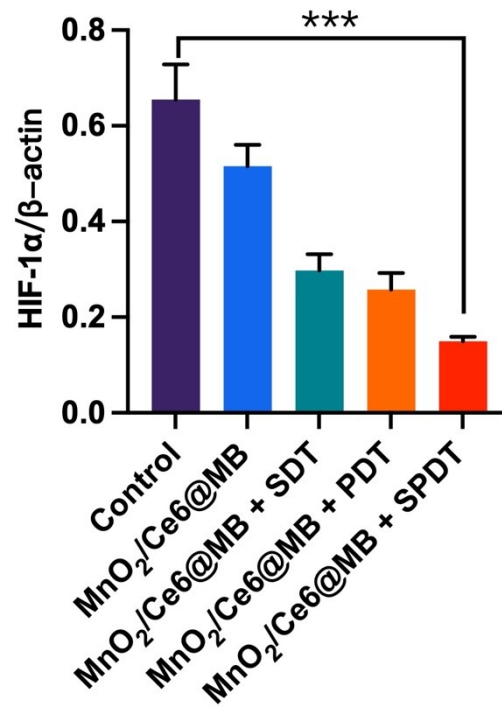

**Fig. S6** Semiquantification of western blot assay of HIF-1 $\alpha$  protein by ImageJ software. \*\*\* $p < 0.005$ .

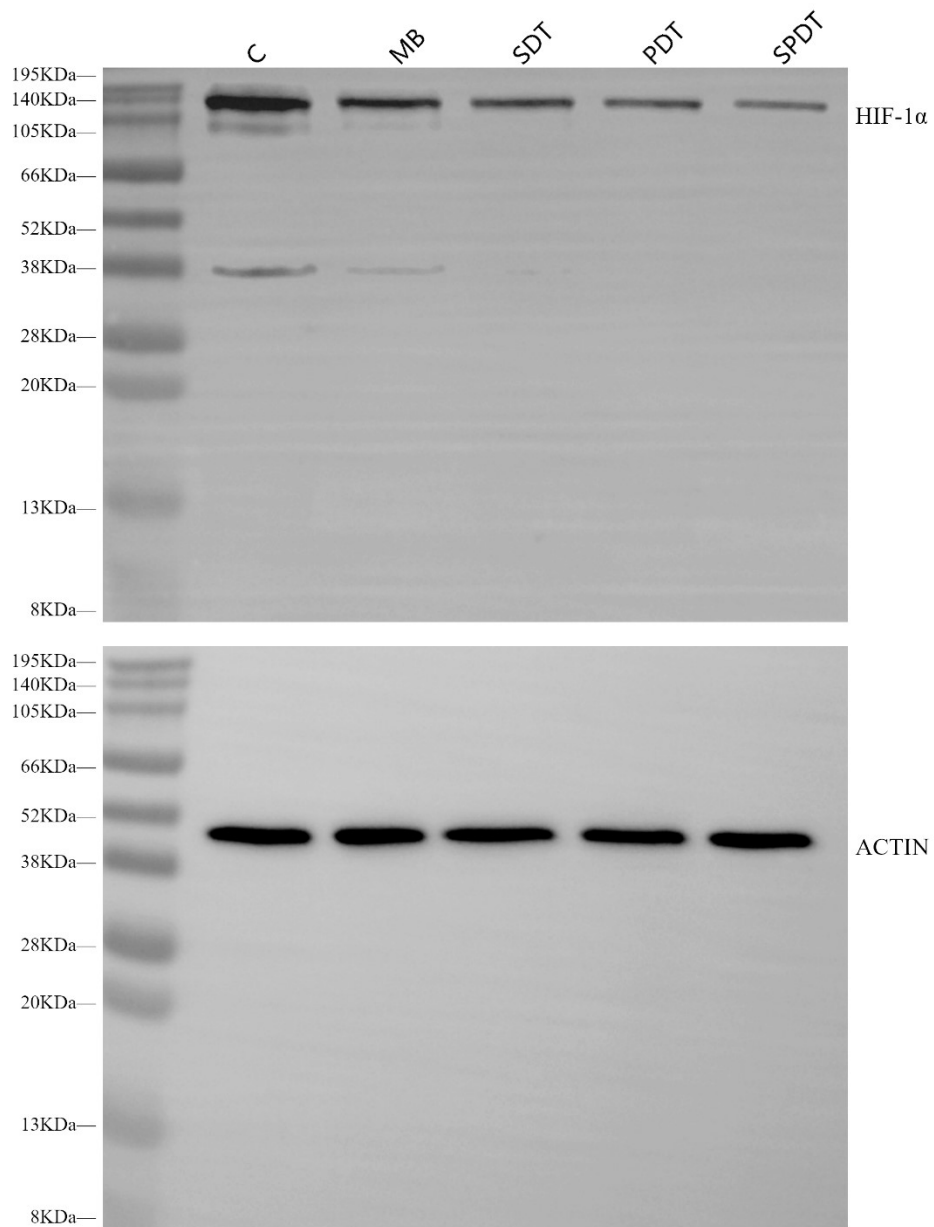

**Fig. S7** Western blot assay of HIF-1 $\alpha$  protein. (G) ELISA assay of HIF-1 $\alpha$  protein.
